# Supplementary material for: Global Burden of Sickle Cell Anaemia in Children under Five, 2010–2050: Modelling Based on Demographics, Excess Mortality, and Interventions
Source: PLOS journal article supplement (doi:10.1371/journal.pmed.1001484), 2013-07-16
Supplement: S4 (10.1371/journal.pmed.1001484.s004) [file journal.pmed.1001484.s004]

Table S3 Indirect economic and mortality indicators per country

| Country                          | Income group class <sup>#</sup> | Newborns with SCA<br>(hSCA) <sup>‡</sup> |        | Gross Domestic Product per Capita<br>(GDPpc) <sup>§</sup> |            | Under-five mortality<br>(U5m) <sup>†</sup> |      |
|----------------------------------|---------------------------------|------------------------------------------|--------|-----------------------------------------------------------|------------|--------------------------------------------|------|
|                                  |                                 | 2010                                     | 2050   | 2010                                                      | 2050       | 2010                                       | 2050 |
| Afghanistan                      | Low                             | 0                                        | 1      | /                                                         | /          | 184                                        | 83   |
| Albania                          | Medium low                      | 29                                       | 18     | 7,547.35                                                  | 42,956.36  | 19                                         | 10   |
| Algeria                          | Medium high                     | 187                                      | 135    | 7,603.91                                                  | 17,568.47  | 27                                         | 12   |
| Angola                           | Medium low                      | 9,476                                    | 9,417  | 5,025.81                                                  | 19,173.06  | 156                                        | 56   |
| Argentina                        | Medium high                     | 4                                        | 4      | 14,388.80                                                 | 38,299.32  | 14                                         | 7    |
| Armenia                          | Medium low                      | 0                                        | 0      | 4,893.84                                                  | 65,852.18  | 27                                         | 15   |
| Aruba                            | /                               | 1                                        | 1      | /                                                         | /          | 17                                         | 9    |
| Australia                        | High                            | 6                                        | 7      | 34,410.35                                                 | 69,263.39  | 5                                          | 4    |
| Austria                          | High                            | 1                                        | 1      | 35,166.25                                                 | 57,982.78  | 5                                          | 3    |
| Azerbaijan                       | Medium high                     | 0                                        | 0      | /                                                         | /          | 43                                         | 17   |
| Bahamas                          | High                            | 8                                        | 7      | 29,804.64                                                 | 50,850.94  | 18                                         | 9    |
| Bahrain                          | High                            | 87                                       | 70     | 21,262.52                                                 | 33,266.41  | 9                                          | 6    |
| Bangladesh                       | Low                             | 14                                       | 9      | 1,495.23                                                  | 7,694.82   | 51                                         | 16   |
| Barbados                         | High                            | 5                                        | 4      | 18,247.88                                                 | 36,601.79  | 14                                         | 8    |
| Belarus                          | Medium high                     | 0                                        | 0      | 12,317.42                                                 | 116,868.45 | 9                                          | 7    |
| Belgium                          | High                            | 29                                       | 32     | 33,454.20                                                 | 50,552.18  | 5                                          | 4    |
| Belize                           | Medium low                      | 51                                       | 43     | 6,566.16                                                  | 21,202.02  | 21                                         | 14   |
| Benin                            | Low                             | 4,998                                    | 6,661  | 1,398.51                                                  | 5,496.62   | 121                                        | 41   |
| Bhutan                           | Medium low                      | 0                                        | 0      | 5,045.25                                                  | 25,228.87  | 52                                         | 19   |
| Bolivia (Plurinational State of) | Medium low                      | 0                                        | 0      | 4,150.46                                                  | 17,976.48  | 54                                         | 14   |
| Bosnia and Herzegovina           | Medium high                     | 1                                        | 1      | /                                                         | /          | 16                                         | 12   |
| Botswana                         | Medium high                     | 4                                        | 3      | 11,680.66                                                 | 52,655.25  | 46                                         | 19   |
| Brazil                           | Medium high                     | 3,152                                    | 2,296  | 10,033.51                                                 | 26,811.87  | 24                                         | 10   |
| Brunei Darussalam                | High                            | 0                                        | 0      | 45,718.20                                                 | 28,686.74  | 6                                          | 4    |
| Bulgaria                         | Medium high                     | 16                                       | 12     | 11,522.37                                                 | 46,168.84  | 11                                         | 8    |
| Burkina Faso                     | Low                             | 3,806                                    | 5,924  | 1,110.95                                                  | 6,226.98   | 147                                        | 45   |
| Burundi                          | Low                             | 910                                      | 677    | 514.05                                                    | 1,532.77   | 152                                        | 53   |
| Cambodia                         | Low                             | 0                                        | 0      | 1,902.60                                                  | 15,548.31  | 69                                         | 17   |
| Cameroon                         | Medium low                      | 7,368                                    | 7,941  | 2,077.08                                                  | 7,137.70   | 136                                        | 51   |
| Canada                           | High                            | 48                                       | 57     | 35,447.10                                                 | 68,871.56  | 6                                          | 4    |
| Cape Verde                       | Medium low                      | 17                                       | 11     | 3,437.89                                                  | 15,485.66  | 22                                         | 10   |
| Central African Republic         | Low                             | 1,050                                    | 1,045  | 718.01                                                    | 2,677.45   | 155                                        | 60   |
| Chad                             | Low                             | 2,269                                    | 2,732  | 1,336.70                                                  | 2,079.14   | 195                                        | 71   |
| Chile                            | Medium high                     | 0                                        | 0      | 14,091.19                                                 | 44,794.61  | 8                                          | 6    |
| China                            | Medium high                     | 0                                        | 0      | 6,592.59                                                  | 56,428.10  | 24                                         | 12   |
| China, Hong Kong SAR             | High                            | 0                                        | 0      | 41,820.74                                                 | 77,916.93  | 3                                          | 3    |
| China, Macao SAR                 | High                            | 0                                        | 0      | /                                                         | /          | 5                                          | 4    |
| Colombia                         | Medium high                     | 323                                      | 255    | 8,472.90                                                  | 17,720.06  | 23                                         | 10   |
| Comoros                          | Low                             | 28                                       | 40     | /                                                         | /          | 86                                         | 25   |
| Congo                            | Medium low                      | 1,855                                    | 2,396  | /                                                         | /          | 104                                        | 38   |
| Costa Rica                       | Medium high                     | 61                                       | 47     | 10,380.62                                                 | 33,021.25  | 11                                         | 6    |
| Côte d'Ivoire                    | Medium low                      | 3,632                                    | 4,097  | 1,691.80                                                  | 4,374.07   | 107                                        | 37   |
| Croatia                          | High                            | 1                                        | 1      | /                                                         | /          | 7                                          | 5    |
| Cuba                             | Medium high                     | 226                                      | 176    | /                                                         | /          | 6                                          | 5    |
| Cyprus                           | High                            | 2                                        | 2      | /                                                         | /          | 5                                          | 4    |
| Czech Republic                   | High                            | 0                                        | 0      | 23,763.52                                                 | 71,100.98  | 4                                          | 3    |
| Dem. People's Republic of Korea  | /                               | 0                                        | 0      | /                                                         | /          | 32                                         | 13   |
| Democratic Republic of the Congo | Low                             | 42,065                                   | 44,663 | 3,811.66                                                  | 4,135.73   | 180                                        | 75   |
| Denmark                          | High                            | 0                                        | 0      | 32,700.07                                                 | 51,626.96  | 5                                          | 4    |
| Djibouti                         | Medium low                      | 0                                        | 0      | 2,050.78                                                  | 4,255.67   | 104                                        | 31   |
| Dominican Republic               | Medium high                     | 240                                      | 173    | 8,390.43                                                  | 45,588.95  | 28                                         | 11   |
| Ecuador                          | Medium low                      | 0                                        | 0      | /                                                         | /          | 23                                         | 10   |
| Egypt                            | Medium low                      | 1,176                                    | 971    | 5,537.72                                                  | 30,222.59  | 25                                         | 11   |
| El Salvador                      | Medium low                      | 79                                       | 53     | /                                                         | /          | 23                                         | 10   |
| Equatorial Guinea                | High                            | 444                                      | 478    | /                                                         | /          | 151                                        | 54   |
| Eritrea                          | Low                             | 10                                       | 10     | /                                                         | /          | 62                                         | 24   |
| Estonia                          | High                            | 0                                        | 0      | 16,676.17                                                 | 107,617.52 | 7                                          | 5    |
| Ethiopia                         | Low                             | 141                                      | 111    | 927.88                                                    | 5,586.91   | 96                                         | 33   |
| Fiji                             | Medium low                      | 0                                        | 0      | 3,967.89                                                  | 11,593.79  | 22                                         | 13   |
| Finland                          | High                            | 0                                        | 0      | 31,549.07                                                 | 53,295.02  | 3                                          | 3    |
| France                           | High                            | 531                                      | 576    | 30,765.50                                                 | 50,375.24  | 4                                          | 3    |
| French Guiana                    | /                               | 6                                        | 8      | /                                                         | /          | 15                                         | 8    |
| French Polynesia                 | /                               | 0                                        | 0      | /                                                         | /          | 10                                         | 7    |
| Gabon                            | Medium high                     | 966                                      | 1,085  | 13,464.66                                                 | 16,008.64  | 64                                         | 26   |
| Gambia                           | Low                             | 471                                      | 564    | 1,888.45                                                  | 9,723.47   | 93                                         | 30   |
| Georgia                          | Medium low                      | 0                                        | 0      | 4,644.63                                                  | 65,582.36  | 27                                         | 13   |
| Germany                          | High                            | 87                                       | 90     | 32,826.69                                                 | 49,025.53  | 4                                          | 3    |
| Ghana                            | Medium low                      | 6,019                                    | 6,855  | 1,439.30                                                  | 5,512.84   | 63                                         | 26   |
| Greece                           | High                            | 202                                      | 211    | 24,790.71                                                 | 58,063.04  | 5                                          | 5    |
| Grenada                          | Medium high                     | 5                                        | 3      | /                                                         | /          | 15                                         | 8    |
| Guadeloupe                       | /                               | 13                                       | 11     | /                                                         | /          | 8                                          | 5    |
| Guam                             | /                               | 0                                        | 0      | /                                                         | /          | 10                                         | 6    |
| Guatemala                        | Medium low                      | 286                                      | 336    | 4,320.94                                                  | 11,056.54  | 34                                         | 15   |
| Guinea                           | Low                             | 5,735                                    | 7,123  | 1,004.95                                                  | 5,421.75   | 134                                        | 46   |
| Guinea-Bissau                    | Low                             | 197                                      | 247    | 1,045.47                                                  | 2,206.68   | 181                                        | 70   |

| Country                          | Income group class <sup>#</sup> | Newborns with SCA<br>(bSCA) <sup>£</sup> |            | Gross Domestic Product per Capita<br>(GDPpc) <sup>§</sup> |            | Under-five mortality<br>(U5m) <sup>*</sup> |           |
|----------------------------------|---------------------------------|------------------------------------------|------------|-----------------------------------------------------------|------------|--------------------------------------------|-----------|
|                                  |                                 | 2010                                     | 2050       | 2010                                                      | 2050       | 2010                                       | 2050      |
|                                  |                                 | Guyana                                   | Medium low | 17                                                        | 11         | 2,663.98                                   | 10,189.12 |
| Haiti                            | Low                             | 1,089                                    | 831        | 998.03                                                    | 2,693.79   | 76                                         | 26        |
| Honduras                         | Medium low                      | 819                                      | 682        | 3,511.72                                                  | 14,771.00  | 33                                         | 14        |
| Hungary                          | High                            | 0                                        | 0          | 17,146.66                                                 | 56,092.60  | 7                                          | 5         |
| Iceland                          | High                            | 0                                        | 0          | 31,611.23                                                 | 52,271.72  | 3                                          | 2         |
| India                            | Medium low                      | 43,496                                   | 33,890     | 3,061.75                                                  | 19,552.50  | 65                                         | 34        |
| Indonesia                        | Medium low                      | 1                                        | 1          | 3,879.17                                                  | 12,110.21  | 31                                         | 17        |
| Iran (Islamic Republic of)       | Medium high                     | 764                                      | 506        | 11,212.23                                                 | 37,979.38  | 31                                         | 14        |
| Iraq                             | Medium low                      | 750                                      | 1,095      | /                                                         | /          | 41                                         | 15        |
| Ireland                          | High                            | 0                                        | 0          | 36,707.21                                                 | 57,646.32  | 4                                          | 4         |
| Israel                           | High                            | 237                                      | 259        | 26,609.29                                                 | 62,560.95  | 4                                          | 2         |
| Italy                            | High                            | 88                                       | 92         | 27,000.73                                                 | 34,343.14  | 4                                          | 3         |
| Jamaica                          | Medium high                     | 135                                      | 76         | /                                                         | /          | 26                                         | 13        |
| Japan                            | High                            | 0                                        | 0          | 31,418.23                                                 | 63,821.38  | 3                                          | 3         |
| Jordan                           | Medium high                     | 145                                      | 112        | 5,020.75                                                  | 26,238.94  | 22                                         | 11        |
| Kazakhstan                       | Medium high                     | 0                                        | 0          | 11,099.94                                                 | 72,379.46  | 29                                         | 14        |
| Kenya                            | Low                             | 5,062                                    | 6,776      | 1,511.95                                                  | 5,642.90   | 89                                         | 34        |
| Kuwait                           | High                            | 112                                      | 146        | 46,122.21                                                 | 47,943.02  | 10                                         | 6         |
| Kyrgyzstan                       | Low                             | 0                                        | 0          | 2,031.25                                                  | 16,387.50  | 42                                         | 23        |
| Lao People's Democratic Republic | Medium low                      | 0                                        | 0          | 2,290.03                                                  | 15,210.14  | 46                                         | 14        |
| Latvia                           | Medium high                     | 0                                        | 0          | 12,827.62                                                 | 96,920.52  | 8                                          | 5         |
| Lebanon                          | Medium high                     | 246                                      | 176        | 12,384.17                                                 | 40,276.33  | 24                                         | 11        |
| Lesotho                          | Medium low                      | 0                                        | 0          | 1,449.25                                                  | 7,523.37   | 89                                         | 31        |
| Liberia                          | Low                             | 621                                      | 841        | /                                                         | /          | 107                                        | 32        |
| Libyan Arab Jamahiriya           | High                            | 168                                      | 123        | /                                                         | /          | 15                                         | 8         |
| Lithuania                        | Medium high                     | 0                                        | 0          | 15,246.39                                                 | 104,906.62 | 9                                          | 6         |
| Luxembourg                       | High                            | 0                                        | 0          | 68,621.91                                                 | 108,000.92 | 3                                          | 3         |
| Madagascar                       | Low                             | 4,121                                    | 6,066      | 867.01                                                    | 2,625.54   | 58                                         | 22        |
| Malawi                           | Low                             | 2,033                                    | 3,990      | 830.66                                                    | 3,395.86   | 119                                        | 54        |
| Malaysia                         | Medium high                     | 0                                        | 0          | 13,167.10                                                 | 46,284.79  | 9                                          | 5         |
| Maldives                         | Medium high                     | 0                                        | 0          | 6,560.49                                                  | 22,009.54  | 12                                         | 6         |
| Mali                             | Low                             | 3,664                                    | 5,203      | 952.99                                                    | 3,953.90   | 173                                        | 58        |
| Malta                            | High                            | 2                                        | 2          | 22,989.80                                                 | 52,844.37  | 7                                          | 5         |
| Martinique                       | /                               | 12                                       | 9          | /                                                         | /          | 8                                          | 5         |
| Mauritania                       | Medium low                      | 492                                      | 579        | 2,076.54                                                  | 6,736.86   | 106                                        | 35        |
| Mauritius                        | Medium high                     | 0                                        | 0          | 11,916.47                                                 | 39,171.14  | 15                                         | 10        |
| Mayotte                          | /                               | 13                                       | 16         | /                                                         | /          | 6                                          | 6         |
| Mexico                           | Medium high                     | 643                                      | 461        | 12,379.02                                                 | 34,016.73  | 17                                         | 7         |
| Micronesia (Fed. States of)      | Medium low                      | 0                                        | 0          | /                                                         | /          | 38                                         | 14        |
| Mongolia                         | Medium low                      | 0                                        | 0          | 3,618.05                                                  | 28,621.64  | 37                                         | 14        |
| Montenegro                       | Medium high                     | 1                                        | 0          | /                                                         | /          | 9                                          | 6         |
| Morocco                          | Medium low                      | 40                                       | 28         | 4,314.75                                                  | 17,889.28  | 31                                         | 13        |
| Mozambique                       | Low                             | 1,838                                    | 2,248      | 836.13                                                    | 8,137.66   | 123                                        | 41        |
| Myanmar                          | /                               | 0                                        | 0          | /                                                         | /          | 57                                         | 15        |
| Namibia                          | Medium high                     | 33                                       | 29         | /                                                         | /          | 39                                         | 19        |
| Nepal                            | Low                             | 11                                       | 9          | 1,070.70                                                  | 5,945.14   | 39                                         | 13        |
| Netherlands                      | High                            | 83                                       | 85         | 36,797.61                                                 | 59,173.35  | 5                                          | 4         |
| Netherlands Antilles             | /                               | 3                                        | 2          | /                                                         | /          | 14                                         | 9         |
| New Caledonia                    | /                               | 0                                        | 0          | /                                                         | /          | 7                                          | 6         |
| New Zealand                      | High                            | 0                                        | 0          | 24,555.86                                                 | 61,120.21  | 6                                          | 5         |
| Nicaragua                        | Medium low                      | 203                                      | 136        | 2,512.49                                                  | 11,521.66  | 22                                         | 10        |
| Niger                            | Low                             | 6,166                                    | 11,937     | 654.05                                                    | 2,323.74   | 144                                        | 45        |
| Nigeria                          | Medium low                      | 99,310                                   | 140,837    | 2,137.45                                                  | 9,014.65   | 141                                        | 49        |
| Norway                           | High                            | 0                                        | 0          | 48,212.93                                                 | 82,286.02  | 4                                          | 3         |
| Oman                             | High                            | 0                                        | 0          | 24,984.94                                                 | 51,630.74  | 11                                         | 6         |
| Pakistan                         | Medium low                      | 225                                      | 173        | 2,467.31                                                  | 10,381.61  | 86                                         | 48        |
| Panama                           | Medium high                     | 145                                      | 128        | 12,376.48                                                 | 55,243.48  | 21                                         | 9         |
| Papua New Guinea                 | Medium low                      | 0                                        | 0          | 2,156.76                                                  | 8,562.70   | 58                                         | 23        |
| Paraguay                         | Medium low                      | 8                                        | 7          | 4,645.02                                                  | 13,939.03  | 33                                         | 13        |
| Peru                             | Medium high                     | 0                                        | 0          | 8,557.18                                                  | 37,349.84  | 28                                         | 12        |
| Philippines                      | Medium low                      | 0                                        | 0          | 3,568.45                                                  | 22,615.21  | 27                                         | 15        |
| Poland                           | High                            | 0                                        | 0          | 17,213.92                                                 | 61,043.70  | 7                                          | 5         |
| Portugal                         | High                            | 39                                       | 34         | 21,498.00                                                 | 42,488.23  | 5                                          | 4         |
| Puerto Rico                      | /                               | 2                                        | 2          | /                                                         | /          | 9                                          | 6         |
| Qatar                            | /                               | 44                                       | 37         | 74,215.82                                                 | 164,189.38 | 10                                         | 7         |
| Republic of Korea                | High                            | 0                                        | 0          | 27,394.53                                                 | 101,458.06 | 5                                          | 4         |
| Republic of Moldova              | Medium low                      | 0                                        | 0          | 2,762.85                                                  | 27,243.35  | 19                                         | 13        |
| Réunion                          | /                               | 0                                        | 0          | /                                                         | /          | 6                                          | 6         |
| Romania                          | Medium high                     | 2                                        | 2          | 10,803.57                                                 | 46,832.71  | 15                                         | 8         |
| Russian Federation               | Medium high                     | 0                                        | 0          | 13,992.92                                                 | 75,488.42  | 16                                         | 10        |
| Rwanda                           | Low                             | 704                                      | 877        | 1,049.78                                                  | 6,957.65   | 114                                        | 41        |
| Saint Lucia                      | Medium high                     | 11                                       | 8          | 9,189.10                                                  | 20,206.48  | 16                                         | 10        |
| Saint Vincent and the Grenadines | Medium high                     | 6                                        | 4          | 10,176.72                                                 | 40,922.99  | 25                                         | 12        |
| Samoa                            | Medium low                      | 0                                        | 0          | /                                                         | /          | 24                                         | 12        |
| Sao Tome and Principe            | Medium low                      | 44                                       | 41         | /                                                         | /          | 69                                         | 28        |
| Saudi Arabia                     | High                            | 785                                      | 598        | 20,695.18                                                 | 24,423.50  | 19                                         | 10        |
| Senegal                          | Medium low                      | 2,760                                    | 3,407      | 1,715.83                                                  | 4,497.91   | 85                                         | 27        |

| Country                            | Income group class <sup>#</sup> | Newborns with SCA<br>(bSCA) <sup>£</sup> |        | Gross Domestic Product per Capita<br>(GDPpc) <sup>§</sup> |            | Under-five mortality<br>(U5m) <sup>*</sup> |      |
|------------------------------------|---------------------------------|------------------------------------------|--------|-----------------------------------------------------------|------------|--------------------------------------------|------|
|                                    |                                 | 2010                                     | 2050   | 2010                                                      | 2050       | 2010                                       | 2050 |
| Serbia                             | Medium high                     | 9                                        | 7      | /                                                         | /          | 13                                         | 7    |
| Sierra Leone                       | Low                             | 3,060                                    | 2,887  | 741.61                                                    | 6,673.60   | 157                                        | 57   |
| Singapore                          | High                            | 0                                        | 0      | 51,052.37                                                 | 124,595.84 | 2                                          | 2    |
| Slovakia                           | High                            | 0                                        | 0      | 20,140.98                                                 | 74,216.17  | 7                                          | 5    |
| Slovenia                           | High                            | 0                                        | 0      | /                                                         | /          | 4                                          | 3    |
| Solomon Islands                    | Medium low                      | 0                                        | 0      | 2,391.90                                                  | 5,351.47   | 43                                         | 13   |
| Somalia                            | /                               | 16                                       | 31     | /                                                         | /          | 162                                        | 61   |
| South Africa                       | Medium high                     | 70                                       | 54     | 9,335.83                                                  | 28,013.88  | 64                                         | 25   |
| Spain                              | High                            | 144                                      | 149    | 27,100.71                                                 | 53,498.78  | 4                                          | 4    |
| Sri Lanka                          | Medium low                      | 2                                        | 1      | 4,555.06                                                  | 22,009.83  | 13                                         | 8    |
| Sudan                              | Medium low                      | 5,151                                    | 5,831  | 2,104.93                                                  | 5,493.41   | 87                                         | 29   |
| Suriname                           | Medium high                     | 19                                       | 14     | 7,398.00                                                  | 29,055.38  | 27                                         | 15   |
| Swaziland                          | Medium low                      | 4                                        | 3      | 4,738.22                                                  | 16,828.09  | 92                                         | 30   |
| Sweden                             | High                            | 0                                        | 0      | 33,614.73                                                 | 58,258.56  | 3                                          | 3    |
| Switzerland                        | High                            | 7                                        | 6      | 37,918.96                                                 | 51,196.62  | 5                                          | 3    |
| Syria                              | Medium low                      | 871                                      | 709    | 4,719.75                                                  | 13,939.38  | 16                                         | 9    |
| Tajikistan                         | Low                             | 0                                        | 0      | 1,938.37                                                  | 14,038.45  | 65                                         | 33   |
| TFYR Macedonia                     | Medium high                     | 8                                        | 6      | /                                                         | /          | 15                                         | 8    |
| Thailand                           | Medium high                     | 0                                        | 0      | 7,676.42                                                  | 25,347.38  | 13                                         | 8    |
| Timor-Leste                        | Medium low                      | 0                                        | 0      | /                                                         | /          | 76                                         | 17   |
| Togo                               | Low                             | 2,082                                    | 2,006  | 882.32                                                    | 3,395.78   | 104                                        | 35   |
| Tonga                              | Medium low                      | 0                                        | 0      | /                                                         | /          | 25                                         | 14   |
| Trinidad and Tobago                | High                            | 51                                       | 36     | 23,085.10                                                 | 98,182.27  | 31                                         | 17   |
| Tunisia                            | Medium high                     | 81                                       | 63     | 8,623.21                                                  | 33,480.68  | 23                                         | 11   |
| Turkey                             | Medium high                     | 313                                      | 240    | 12,918.79                                                 | 47,546.04  | 23                                         | 10   |
| Turkmenistan                       | Medium low                      | 0                                        | 0      | /                                                         | /          | 62                                         | 31   |
| Uganda                             | Low                             | 11,923                                   | 17,170 | 1,151.92                                                  | 6,242.35   | 114                                        | 43   |
| Ukraine                            | Medium low                      | 0                                        | 0      | 6,096.34                                                  | 50,881.51  | 15                                         | 9    |
| United Arab Emirates               | High                            | 6                                        | 6      | 44,454.37                                                 | 51,043.90  | 8                                          | 6    |
| United Kingdom                     | High                            | 312                                      | 334    | 32,744.90                                                 | 58,177.16  | 6                                          | 4    |
| United Republic of Tanzania        | Low                             | 13,446                                   | 24,655 | 1,256.13                                                  | 8,877.29   | 81                                         | 28   |
| United States of America           | High                            | 2,919                                    | 3,379  | 43,137.96                                                 | 64,997.27  | 8                                          | 6    |
| United States Virgin Islands       | /                               | 0                                        | 0      | /                                                         | /          | 12                                         | 8    |
| Uruguay                            | Medium high                     | 1                                        | 1      | 12,961.44                                                 | 35,619.46  | 15                                         | 7    |
| Uzbekistan                         | Medium low                      | 0                                        | 0      | /                                                         | /          | 53                                         | 29   |
| Vanuatu                            | Medium low                      | 0                                        | 0      | 3,990.97                                                  | 14,373.01  | 29                                         | 11   |
| Venezuela (Bolivarian Republic of) | Medium high                     | 445                                      | 369    | 10,881.88                                                 | 21,697.94  | 20                                         | 10   |
| Viet Nam                           | Medium low                      | 0                                        | 0      | 2,841.12                                                  | 16,414.79  | 23                                         | 13   |
| Western Sahara                     | /                               | 4                                        | 3      | /                                                         | /          | 45                                         | 14   |
| Yemen                              | Medium low                      | 91                                       | 115    | 2,385.48                                                  | 6,612.82   | 57                                         | 15   |
| Zambia                             | Medium low                      | 7,015                                    | 15,440 | 1,387.99                                                  | 5,710.07   | 130                                        | 44   |
| Zimbabwe                           | Low                             | 534                                      | 411    | /                                                         | /          | 71                                         | 31   |

<sup>#</sup> Based on the 2010 gross national incomes (GNI) per capita calculated by the World Bank (<http://data.worldbank.org/indicator/NY.GNP.PCAP.CD>).

<sup>£</sup> Median estimate based on estimates published in Piel et al [21].

<sup>§</sup> Based on the BASELINE database of the French Research Center in International Economics (<http://www.cepii.fr/anglaisgraph/bdd/baseline.htm>).

<sup>\*</sup> Based on the 2010 Revision of the United Nations World Population Prospects [22].
